# Supplementary material
Source: PubMed Central journal article supplement (PMC3955967)
Supplement: Supp_Table1.pdf [file Supp_Table1.pdf]

## Supplementary Data

SUPPLEMENTARY TABLE S1. PRIMERS FOR POLYMERASE CHAIN REACTION AMPLIFICATION OF *REP* AND *CAP* GENES FOR CLONING OF pIR-VP-HR2-RBE- OR pIR-REP78-HR2-RBE-DERIVED CONSTRUCTS (FIG. 1A) OR FOR QUANTITATIVE ANALYSIS OF RECOMBINANT ADENO-ASSOCIATED VIRUS VECTOR PREPARATIONS

| <i>Primer</i> | <i>5'-sequence-3'</i>                           |
|---------------|-------------------------------------------------|
| AAV3-Fwd      | 5'-ATTAAGATCTTGTTAAGACGGCTGCTGACGGTTATC-3'      |
| AAV4-Fwd      | 5'-AATTAAGGATCCTGTGAAGACGACTGACGGTTACCTTC-3'    |
| AAV5-Fwd      | 5'-AATTAAGATCTTGTTAAGACGCTCTTTTGTGATCACCC-3'    |
| AAV6-Fwd      | 5'-AATTAAGGATCCTGTGAAGACGGCTGCCGATGGTTATC-3'    |
| AAV7-Fwd      | 5'-AATTAAGGATCCTGTGAAGACGGCTGCCGATGGTTATCTTC-3' |
| AAV7-Rev      | 5'-AATTAAGTCGACTTACAGATTACGGGTGAGG-3'           |
| AAV8-Fwd      | 5'-AATTAAGATCTTGTTAAGACGGCTGCCGATGGTTATC-3'     |
| AAV9-Fwd      | 5'-AATTAAGATCTTGTTAAGACGGCTGCCGATGGTTATCTTC-3'  |
| pDP-Rev       | 5'-AATTAATGATCAGATACATTGATGAGTTTGGAC-3'         |
| AAVrh10-Fwd   | 5'-GGAGATCTCCTGTCGATTGGCTCGAG-3'                |
| AAVrh10-Rev   | 5'-GCTCTAGACGAATCTTCGCAGAGACC-3'                |
| AAV11/12-Fwd  | 5'-AATTAAGGATCCTGTGAAGACGGCTGCTGACGGTTATCTTC-3' |
| AAV11-Rev     | 5'-AATTAATCTAGATTACAAATGATTAGTCAAATAAC-3'       |
| AAV12-Rev     | 5'-AATTAATCTAGATTACAAGTGGTGGGTGAGGAAAC-3'       |
| AAV4-Rep-Fwd  | 5'-AATTAAGCGGCCGCAAAATGTGGTCAGGAGGGTATATAACC-3' |
| AAV4-Rep-Rev  | 5'-AATTAATCTAGATTATTGTTCCATGTCACAGTC-3'         |
| AAV12-Rep-Fwd | 5'-AATTAAGATCTGAAGTTTGAACGAGCAGCAG-3'           |
| AAV12-Rep-Rev | 5'-AATTAATCTAGATTATTGCTCAAATTGGCAATCGTCC-3'     |
| Bga-1         | 5'-CTAGAGCTCGCTGATCAGCC-3'                      |
| Bga-2         | 5'-TGTCTTCCAATCTCCCCC-3'                        |
| Rep-Fwd       | 5'-GGTGGAGCATGAATTCTACG-3'                      |
| Cap1-Rev      | 5'-TGGTTATACCGCAGGTACGG-3'                      |
| Cap2-Rev      | 5'-CGTAGGCTTTGTCGTGCTCG-3'                      |
| Cap8-Rev      | 5'-CCGCAGGTACGGATTGTCAC-3'                      |

Fwd, forward; Rev, reverse.
